# Supplementary material for: Multifunctional self-refrigerated multivariate {GdLn} (Ln = Dy, Tb, Tb/Eu) metal–organic frameworks
Source: Royal Society of Chemistry journal article supplement (doi:10.1039/d4ta03835e), 2024-01-01
Supplement: d4ta03835e1.pdf [file d4ta03835e1.pdf]

## Electronic Supplementary Information

### **Multifunctional self-refrigerated multivariate {GdLn} (Ln = Dy, Tb, Tb/Eu) metal-organic frameworks**

L. Zhen,<sup>a,b</sup> A. Arauzo,<sup>c</sup> C. Roscini,<sup>d</sup> J. Giner Planas<sup>a\*</sup> and E. Bartolomé<sup>a\*</sup>

<sup>a</sup> Institut de Ciència de Materials de Barcelona (ICMAB)-CSIC, Campus UAB, 08193-Bellaterra, Spain

<sup>b</sup> Shandong Provincial Key Laboratory of Monocrystalline Silicon Semiconductor Materials and Technology, College of Chemistry and Chemical Engineering, Dezhou University, Dezhou 253023, China

<sup>c</sup> Instituto de Nanociencia y Materiales de Aragón (INMA), CSIC-Universidad de Zaragoza, and Departamento de Física de la Materia Condensada, 50009 Zaragoza, Spain

<sup>d</sup> Catalan Institute of Nanoscience and Nanotechnology (ICN2) CSIC and Barcelona Institute of Science and Technology (BIST) Bellaterra, Barcelona 08193, Spain

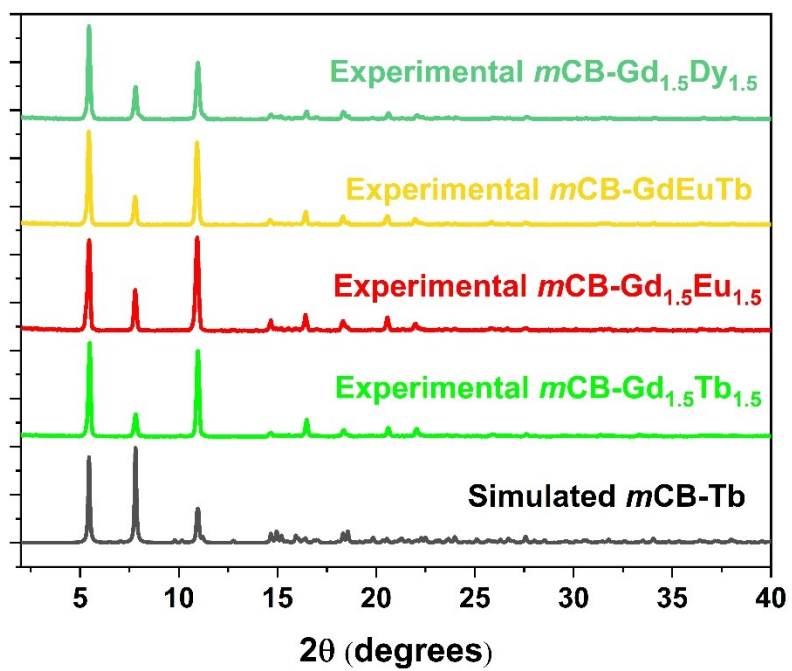

**Figure S1.** Comparison calculated ( $mCB-Tb$ ) and experimental ( $mCB-Gd_{1.5}Dy_{1.5}$ ,  $mCB-GdEuTb$ ,  $mCB-Gd_{1.5}Eu_{1.5}$  and  $mCB-Gd_{1.5}Tb_{1.5}$ ) PXRD patterns.

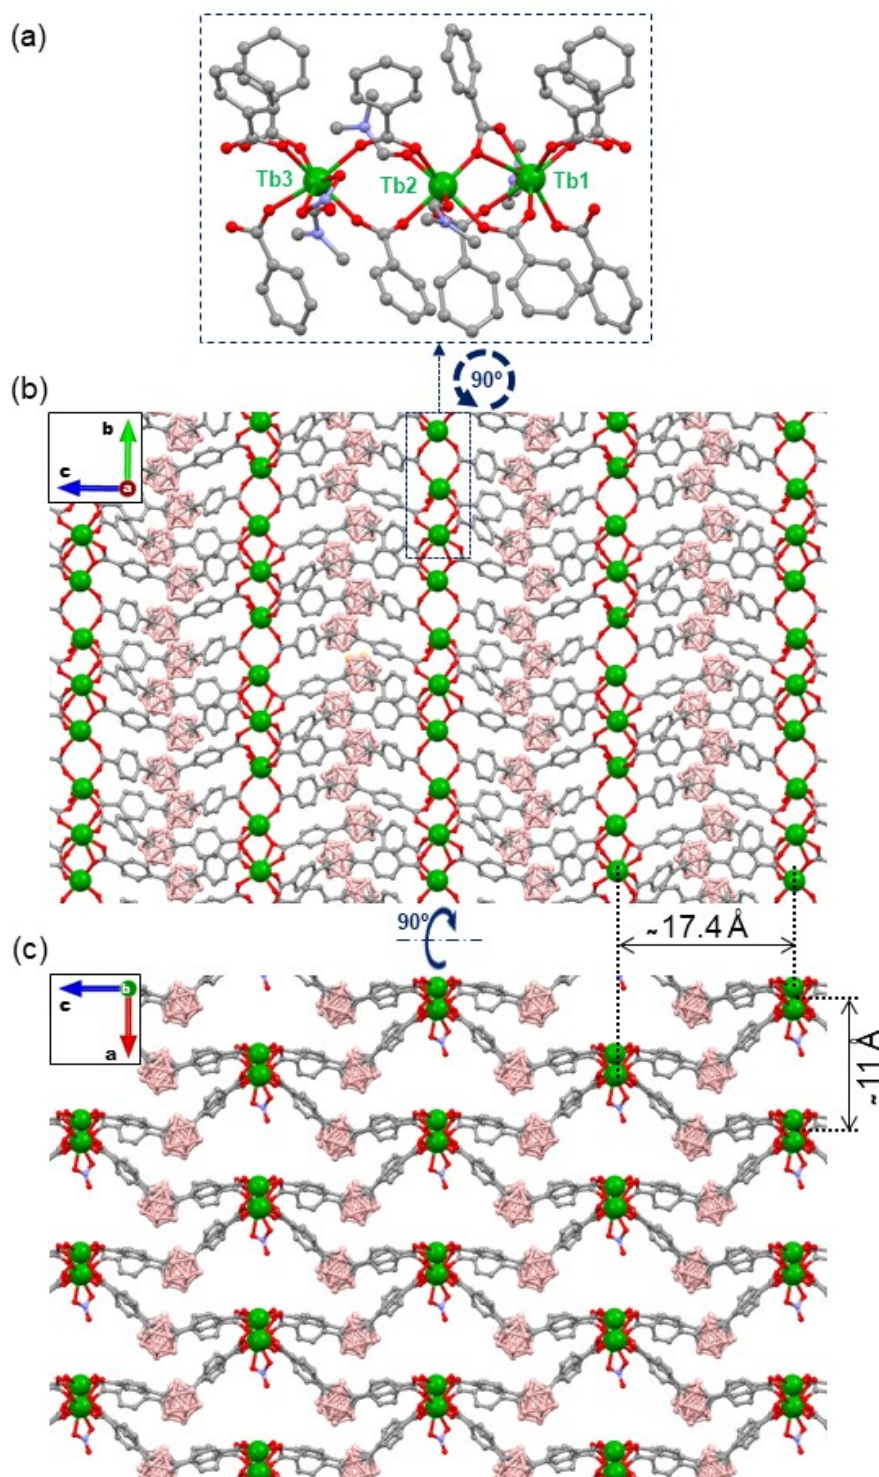

**Figure S2.** Structure of  $\{[(\text{Tb})_3(\text{mCB-L})_4(\text{NO}_3)(\text{DMF})_n] \cdot \text{Solv}\}$ . (a) View of the coordination of *mCB-L* to the three independent Tb atoms that are repeated along the structure. (b,c) Two perpendicular views of the extended 3D framework, showing the 1-D Tb chains. Distances between the polymeric 1D Tb chains are indicated. Colour code: Tb (green), O (red), B (orange), C (grey); N (blue); H atoms (a-c) and DMF molecules (b-c) are omitted for clarity.

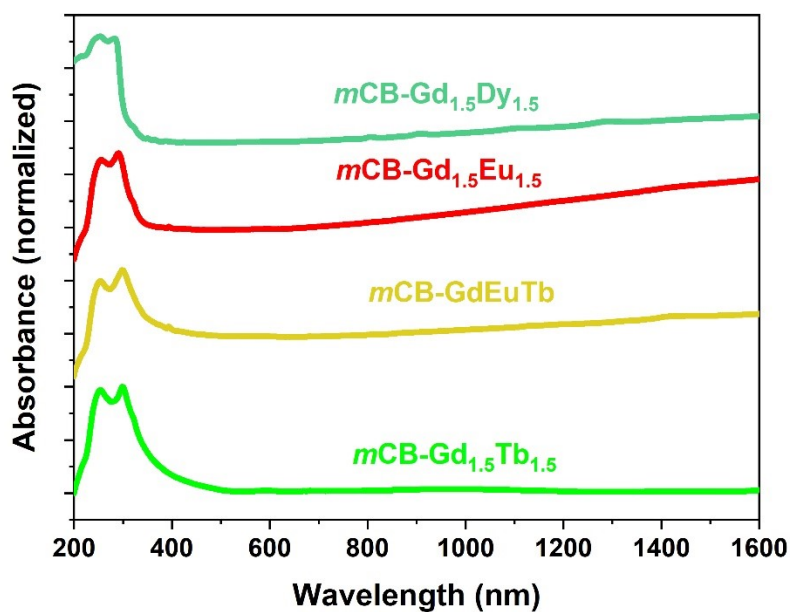

**Figure S3.** Solid state UV-vis spectra for  $\text{Gd}_{1.5}\text{Dy}_{1.5}$  (a),  $\text{Gd}_{1.5}\text{Tb}_{1.5}$  (b),  $\text{Gd}_{1.5}\text{Eu}_{1.5}$ (c) and  $\text{GdEuTb}$  MOFs.

**Table S1.** Orbital ( $m_L$ ), spin ( $m_s$ ) and total magnetic moment ( $m_{\text{TOT}} = m_L + m_s$ ) for each ion in the mixed  $\{\text{GdLn}\}$  MOFs determined from the XAS-XMCD spectra at 3.4 K and 6 T using the corrected sum rules for lanthanides.<sup>1,2</sup>

| MOF                              | Ln                                               | $n_h$ | $m_L/\text{ion}$<br>( $\mu_B$ ) | $m_s/\text{ion}$<br>( $\mu_B$ ) | $m_{\text{TOT}}/\text{ion}$<br>( $\mu_B$ ) |
|----------------------------------|--------------------------------------------------|-------|---------------------------------|---------------------------------|--------------------------------------------|
| $\text{Gd}_{1.5}\text{Dy}_{1.5}$ | $\text{Gd}^{3+}$                                 | 7     | 0.36                            | 6.37                            | 6.72                                       |
|                                  | $\text{Dy}^{3+}$                                 | 5     | 2.51                            | 2.34                            | 4.85                                       |
| $\text{Gd}_{1.5}\text{Tb}_{1.5}$ | $\text{Gd}^{3+}$                                 | 7     | 0.37                            | 6.31                            | 6.68                                       |
|                                  | $\text{Tb}^{3+}$                                 | 6     | 1.59                            | 2.73                            | 4.32                                       |
| $\text{Gd}_{1.5}\text{Eu}_{1.5}$ | $\text{Gd}^{3+}$                                 | 7     | 0.35                            | 6.39                            | 6.74                                       |
|                                  | Eu ( $\text{Eu}^{2+}/\text{Eu}^{3+}=0.24/0.76$ ) | 7.76  | -0.06                           | 2.11                            | 2.05                                       |
| $\text{GdEuTb}$                  | $\text{Gd}^{3+}$                                 | 7     | 0.30                            | 6.32                            | 6.62                                       |
|                                  | Eu ( $\text{Eu}^{2+}/\text{Eu}^{3+}=0.26/0.74$ ) | 7.73  | 0.01                            | 2.11                            | 2.12                                       |
|                                  | $\text{Tb}^{3+}$                                 | 6     | 1.39                            | 2.95                            | 4.34                                       |

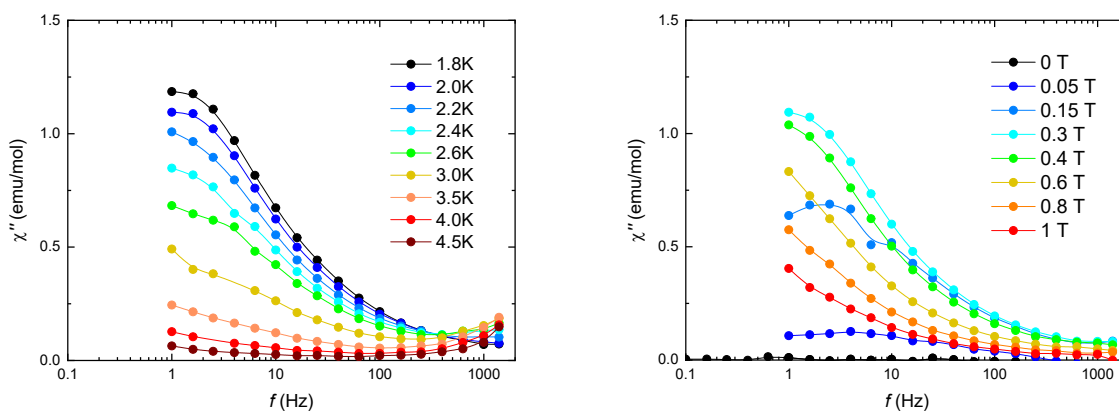

**Figure S4.** Spin magnetic relaxation of mixed {GdEuTb} MOF. Left: imaginary component of the ac susceptibility as a function of the frequency,  $\chi''(f)$ , at  $\mu_0 H=0.3$  T, and Right: at  $T=2$  K and different applied magnetic fields.

**Table S2.** Comparison of solid state fluorescence parameters for mixed {GdLn} MOFs.

| MOF                                 | $\lambda_{em}$ (nm)          | $\Phi$ (%) | $\tau$ ( $\mu s$ )                                       |
|-------------------------------------|------------------------------|------------|----------------------------------------------------------|
| Gd <sub>1.5</sub> Dy <sub>1.5</sub> | 480, 572, 665                | 0.2        | 37.3                                                     |
| Gd <sub>1.5</sub> Tb <sub>1.5</sub> | 488, 542, 582, 619           | 7.3        | 872.5                                                    |
| Gd <sub>1.5</sub> Eu <sub>1.5</sub> | 543, 591, 614, 652, 699      | 4.2        | 739.1                                                    |
| GdEuTb                              | 488, 541, 591, 614, 652, 699 | 4.5        | 867.1 for Tb <sup>3+</sup><br>744.1 for Eu <sup>3+</sup> |

$\lambda_{exc} = 280$  nm.

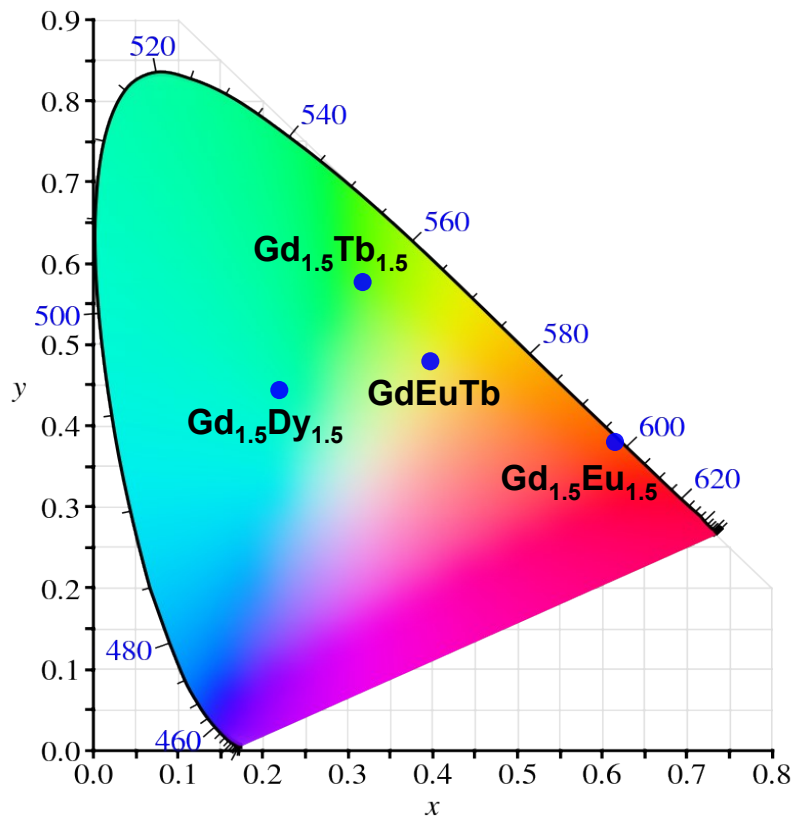

Figure S5. Color coordinates drawn onto the 1931 CIE chromaticity diagram for  $\text{Gd}_{1.5}\text{Dy}_{1.5}$ ,  $\text{Gd}_{1.5}\text{Tb}_{1.5}$  and  $\text{Gd}_{1.5}\text{Eu}_{1.5}$  and  $\text{GdEuTb}$ .

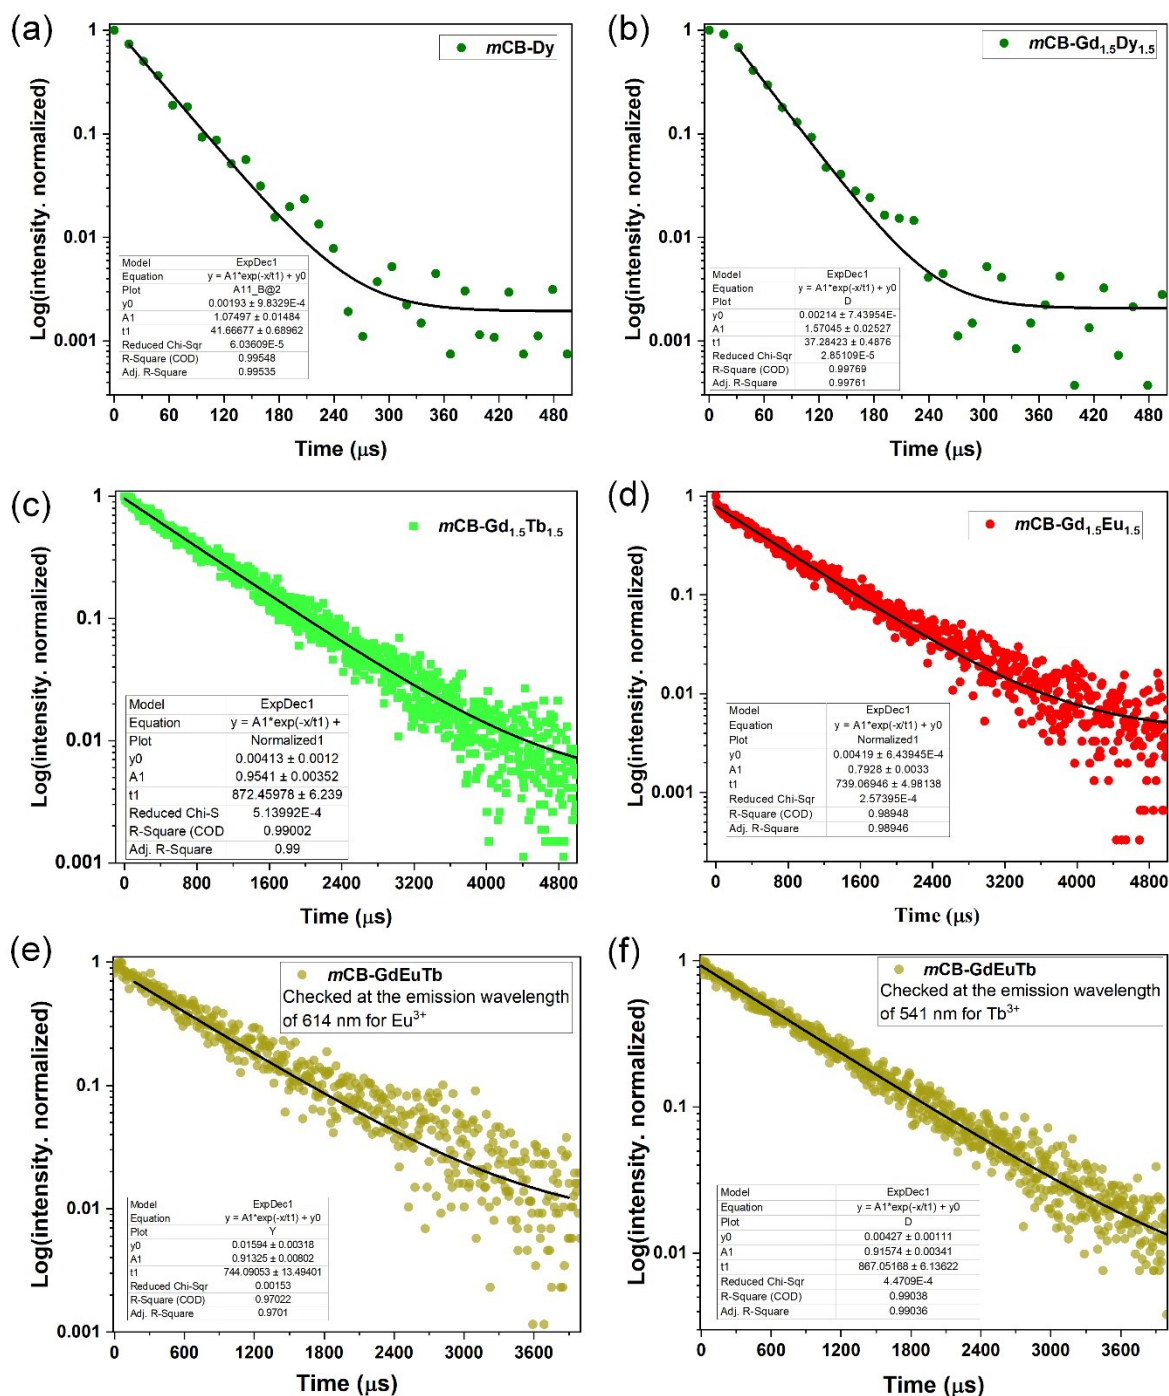

**Figure S6.** Luminescence decays of  $m\text{CB-Dy}$  (a),  $m\text{CB-Gd}_{1.5}\text{Dy}_{1.5}$  (b),  $m\text{CB-Gd}_{1.5}\text{Tb}_{1.5}$  (c),  $m\text{CB-Gd}_{1.5}\text{Eu}_{1.5}$  (d) and  $m\text{CB-GdEuTb}$  (e and f) under continuous-wave irradiation ( $\lambda_{\text{exc}} = 280 \text{ nm}$ ) at room temperature.

## References

- 1 S. Tripathi, Max-Planck-Institut für Intelligente Systeme, Stuttgart, 2018.
- 2 B. Thole, P. Carra, F. Sette and G. van der Laan, *Phys. Rev. Lett.*, 1992, **68**, 1943–1946.
